# Supplementary material for: Upconversion circularly polarized luminescence of cholesteric liquid crystal polymer networks with NaYF4:Yb,Tm UCNPs
Source: Royal Society of Chemistry journal article supplement (doi:10.1039/d4mh00966e), 2024-01-01
Supplement: d4mh00966e1.pdf [file d4mh00966e1.pdf]

*Supporting Information for*

# **Upconversion circularly polarized luminescence of cholesteric liquid crystal polymer networks with NaYF<sub>4</sub>:Yb,Tm UCNPs**

Liting Xu, Yi Li, Wei Liu\* and Yonggang Yang\*

State and Local Joint Engineering Laboratory for Novel Functional Polymeric Materials, Jiangsu Engineering Laboratory of Novel Functional Polymeric Materials, Department of Polymer Science and Engineering, College of Chemistry, Chemical Engineering and Materials Science, Soochow University, Suzhou 215123, P. R. China. Email: W. Liu, [weiliu@suda.edu.cn](mailto:weiliu@suda.edu.cn); Y. Yang, [ygyang@suda.edu.cn](mailto:ygyang@suda.edu.cn).

## Experimental Section

### Materials and instruments

Compounds NaF,  $Y(NO_3)_3 \cdot 6H_2O$ ,  $Yb(NO_3)_3 \cdot 5H_2O$ ,  $Tm(NO_3)_3 \cdot 5H_2O$ , citric acid and NaOH were obtained from Aladdin Chemical Co., Ltd (Shanghai, China). Ethylene glycol, dichloromethane, and ethanol (EtOH) were purchased from Shanghai Lingfeng Chemical Reagent Co., Ltd. LC242 was given by Wuxi Wanli Adhesive Material Co., Ltd. CA-iso was given by Soochiral Sci. & Tec. Co., Ltd. Photoinitiator BDK was purchased from Adamas Chemical Co., Ltd (Shanghai, China), and Irgacure 907 was purchased from Aladdin Chemical Co., Ltd (Shanghai, China). Polyethylene terephthalate (PET) films were purchased from Nanya plastics Co., Ltd (Nantong, China). Absorption-type left- and right-handed circular polarizers (LH- and RH-CP) of the Nitto Brand (model: YPM12) were used. The centrifugation was achieved using a CENCE H1850 centrifugal separator (Zhejiang, China). Powder X-ray diffraction (PXRD) data were recorded on a Bruker D8 Advance (Germany) X-ray Powder diffractometer with Cu K $\alpha$  radiation ( $\lambda = 1.54056 \text{ \AA}$ ). Cross-sectional FE-SEM images for CLCN films were obtained using a Hitachi Regulus 8230 operating (Ibaraki Prefecture, Japan) at 5.0 kV. Energy dispersive spectrometer (EDS) elemental mappings for UCNPs were obtained using a Hitachi Regulus8230 operating (Ibaraki Prefecture, Japan) equipped with an Oxford EDS at 15.0 kV. The photopolymerization was conducted using a UV lamp (SVC365NM, 365 nm, 5 W, output power) produced by Ninghai County Forres Electric Appliance Co., Ltd (Zhejiang, China) and a high-pressure Hg lamp (MINHIO 4012-20, 350–450 nm, 1.0 kW, input power) produced by MINHIO Intelligent Equipment Co., Ltd (Shenzhen, China). DRCD spectra were measured using a JASCO 815 spectrometer (Tokyo, Japan). UV–vis spectra were measured by a UV–vis–NIR spectrophotometer (UV3600, Shimadzu, Japan). POM images of the target compounds were taken using a Leica Microsystems CMS GmbH fitted with a Linkam LTS420 hot stage. Fluorescence spectra were measured on a steady-state lifetime fluorescence spectrometer FLS1000 (Edinburgh Instrument, UK) equipped with an external 980-nm laser resource (power, 0–2 W).

### Synthesis of UCNPs.

The UCNPs were synthesized similarly to the procedure described in previous literature.<sup>S1, S2</sup> A solution of NaF (210.0 mg, 5 mmol) in a mixed solvent of H<sub>2</sub>O (5 mL) and ethylene glycol (5 mL) was added slowly into a solution of  $Y(NO_3)_3 \cdot 6H_2O$  (306.4 mg, 0.800 mmol),  $Yb(NO_3)_3 \cdot 5H_2O$  (89.8 mg, 0.200 mmol),  $Tm(NO_3)_3 \cdot 5H_2O$  (4.5 mg, 0.010 mmol), citric acid (2.33 g, 12.1 mmol) and NaOH (0.48 g, 12.1 mmol) in ethylene glycol (10 mL). The mixed solution was stirred for 1 h, then transferred into a stainless-steel Teflon autoclave, sealed and heated at 180 °C for 12 h. After the reaction mixture was naturally cooled

down to room temperature. The resulting precipitate was isolated by centrifugation at a rotator speed of 5000 rpm for 6 min, washed with H<sub>2</sub>O and EtOH, and dried in a vacuum to afford UCNPs.

#### **Preparation for free-standing CLCN-UCNP films**

According to Table S1, the reactive acrylate compound LC242, photoinitiator BDK, chiral additive CA-*iso*, and UCNPs were added into a solvent mixture of dichloromethane and EtOH. The mixture was sonicated fully. Then the solvent on the surface of a glass slide was evaporated completely at 90 °C for 5 min. The thickness of the liquid layer was controlled using an 11- $\mu$ m-thick spacer in the middle between two glass slides. After cooling to 65 °C, photopolymerization of the CLC layer was carried out using a 365-nm UV lamp (5.0 W) for 10.0 s. Then free-standing CLCN-UCNPs films were obtained and peeled off from the glass slides with a blade.

#### **Preparation of the CLCN-UCNPs coated PET film**

The CLCN-UCNPs coated PET film was prepared using the CLC mixture LC242/CA-*iso*/UCNPs/Irgacure 907 (w/w/w/w, 90.3/3.7/3.0/3.0). The CLC mixture was dissolved in a mixed solvent of cyclohexane and EA to form a solution with 20 wt% of solid content, and coated on a PET film using a 40  $\mu$ m Mayer bar for controlling the thickness. After coating, the sample was heated at 120 °C for 5 min to evaporate the solvent. Finally, the film was obtained by curing with a high-pressure Hg lamp (1.0 kW).

#### **Preparation of the PMMA-UCNPs film**

The PMMA and UCNPs (w/w, 97.0/3.0) were added into a mixed solvent of dichloromethane and EtOH. After casting the solution onto the surface of a quartz plate, and keeping the coated quartz plate at 90 °C for 5 min, a thin PMMA-UCNPs film was obtained.

**Table S1** Summary of UCNPs-based CPL materials with  $|g_{lum}|$  values higher than 0.1 in the literature.

| UCNPs-based UC-CPL materials                                       | $\lambda_{ex}$ (nm) | $\lambda_{em}$ (nm) | $g_{lum}$ values    | Ref. | Year | Remarks                        |
|--------------------------------------------------------------------|---------------------|---------------------|---------------------|------|------|--------------------------------|
| CNC/glycerol composite film, G1-U                                  | 974                 | 450                 | -0.156              | S3   | 2019 | Humidity control               |
| R811-LC-UCNPs                                                      | 980                 | 475                 | +0.3                | S4   | 2020 | Using the liquid crystal cell  |
| R811-LC-UCNPs-CsPbBr <sub>3</sub>                                  | 980                 | 495                 | +1.1                | S4   | 2020 | Using the liquid crystal cell  |
| Switch 6/UCNP/SLC1717                                              | 980                 | 605                 | +0.49               | S5   | 2020 | Using the liquid crystal cell  |
| NaGdF <sub>4</sub> Yb <sup>3+</sup> ,Er <sup>3+</sup> @Carbon Dots | 980                 | 543                 | +0.84               | S6   | 2022 | Cholesteric nanocellulose film |
| Composite I                                                        | 980                 | 523, 542            | +1.8                | S7   | 2022 | Using the liquid crystal cell  |
| Composite II                                                       | 980                 | 654                 | +1.9                | S7   | 2022 | Using the liquid crystal cell  |
| UCNPs-on-Meta                                                      | 980                 | 803, 863, 894       | +0.34, +0.84, +0.95 | S8   | 2022 | Plasmonic chiral metasurface   |
| S811/UCNPs-1/SLC1717                                               | 1532                | 542                 | -0.83               | S9   | 2023 | Using the liquid crystal cell  |
| R811-SLC1717-UCNPs                                                 | 980                 | 802                 | -0.5                | S10  | 2023 | Using the liquid crystal cell  |
| S811-SLC1717-UCNPs                                                 | 980                 | 802                 | +0.5                | S10  | 2023 | Using the liquid crystal cell  |

**Table S2** Mass percentages of compounds in free-standing CLCN-UCNPs films with different concentrations of CA-*iso*.

| LC242 | UCNPs | BDK | CA- <i>iso</i> |
|-------|-------|-----|----------------|
| 93.2  | 3.0   | 1.0 | 2.8            |
| 93.1  | 3.0   | 1.0 | 2.9            |
| 92.5  | 3.0   | 1.0 | 3.5            |
| 92.3  | 3.0   | 1.0 | 3.7            |
| 91.8  | 3.0   | 1.0 | 4.2            |

**Table S3** Mass percentages of compounds in CLCN-coated PET films with different concentrations of CA-*iso*.

| LC242 | Irgacure 907 | CA- <i>iso</i> |
|-------|--------------|----------------|
| 93.9  | 3.0          | 3.1            |
| 93.4  | 3.0          | 3.6            |
| 93.2  | 3.0          | 3.8            |
| 93.0  | 3.0          | 4.0            |
| 92.8  | 3.0          | 4.2            |
| 92.5  | 3.0          | 4.5            |

## References

- S1 J. Wang, Y. Zhao, B. Li, L. Sun and J. Chen, *Mater. Lett.*, 2013, **93**, 297.
- S2 R. Rafique, S. H. Baek, L. M. T. Phan, S.-J. Chang, A. R. Gul and T. J. Park, *Mat. Sci. Eng. C*, 2019, **99**, 1067.
- S3 W. Li, M. Xu, C. Ma, Y. Liu, J. Zhou, Z. Chen, Y. Wang, H. Yu, J. Li and S. Liu, *ACS Appl. Mater. Interfaces*, 2019, **11**, 23512.
- S4 X. Yang, M. Zhou, Y. Wang and P. Duan, *Adv. Mater.*, 2020, **32**, 2000820.
- S5 A. Juan, H. Sun, J. Qiao and J. Guo, *Chem. Commun.*, 2020, **56**, 13649.
- S6 Y. Dong, H. Zhao, S. Wang, Q. Cheng, S. Liu and Y. Li, *ACS Appl. Mater. Interfaces*, 2022, **14**, 40313.
- S7 H. He, J. Wang, K. Li, M. Cen, W. Cai, J. Liu, D. Luo, Y. Q. Lu and Y. J. Liu, *Laser Photonics Rev.*, 2022, **16**, 2200115.
- S8 H. He, M. Cen, J. Wang, Y. Xu, J. Liu, W. Cai, D. Kong, K. Li, D. Luo, T. Cao and Y. J. Liu, *ACS Appl. Mater. Interfaces*, 2022, **14**, 53981.
- S9 C. Jiang, Y. Shi, X. Yang, T. Zhao, J. Zhou, X. Jin, Y. Zhang and P. Duan, *Adv. Opt. Mater.*, 2023, **11**, 2300001.
- S10 X. Yang, X. Jin, A. Zheng and P. Duan, *ACS Nano*, 2023, **17**, 2661.

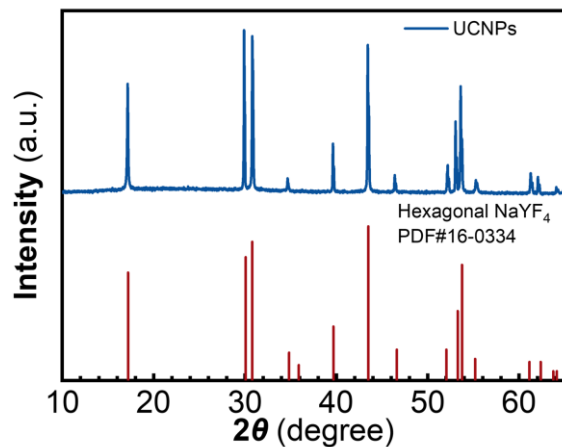

**Fig. S1** PXRd pattern of UCNPs and the standard card of hexagonal phase NaYF<sub>4</sub> (Joint Committee on Powder Diffraction Standards, JCPDS-16-0334).

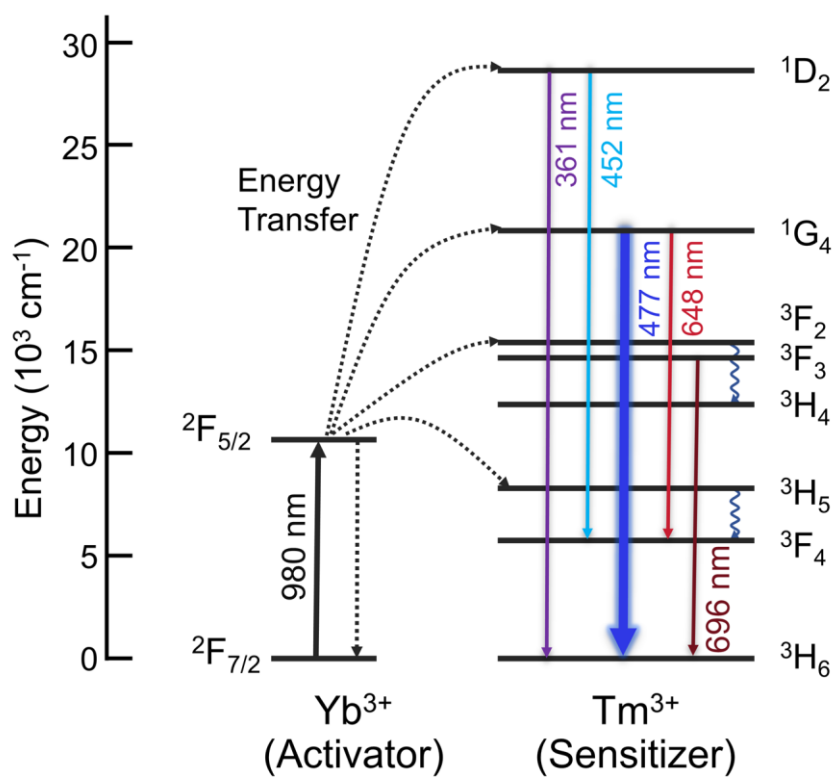

**Fig. S2** Energy-level diagrams and proposed UCL energy transfer pathways of NaYF<sub>4</sub>:Yb,Tm UCNPs.

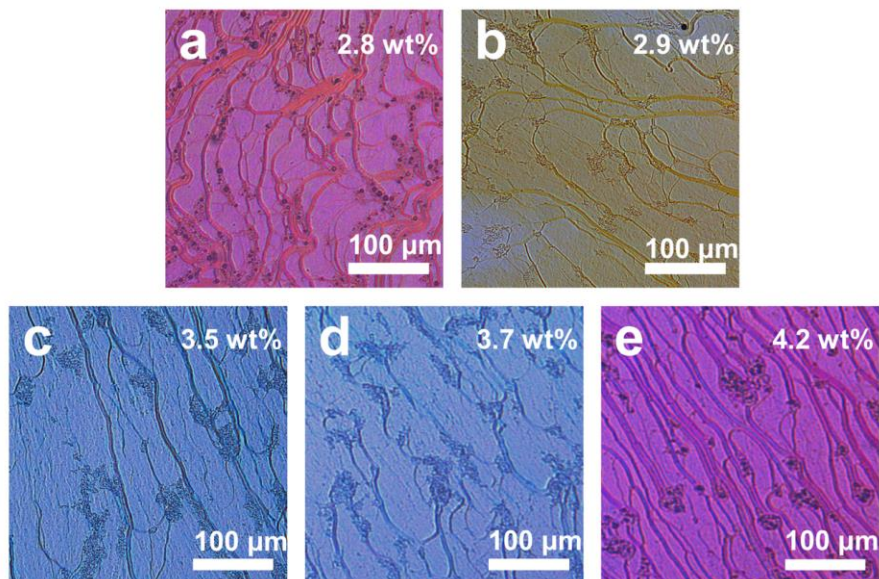

**Fig. S3** POM images of UCNPs-CLC mixtures at different concentrations of CA-iso at 85 °C: (a) 2.8 wt%, (b) 2.9 wt%, (c) 3.5 wt%, (d) 3.7 wt% and (e) 4.2 wt%.

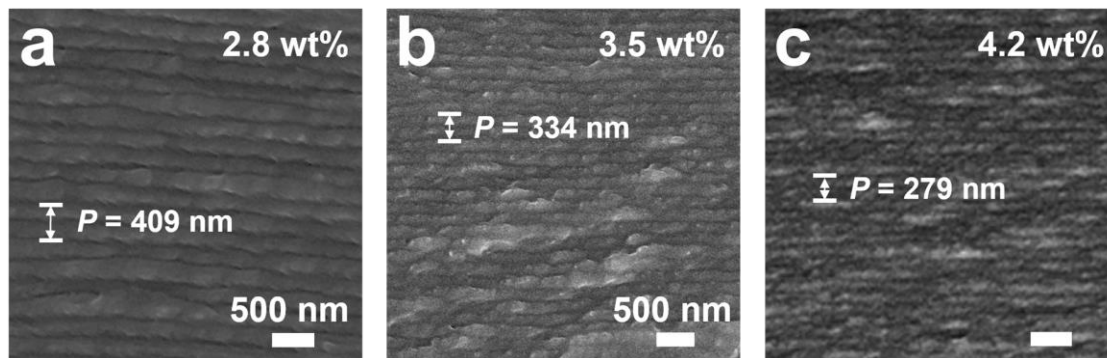

**Fig. S4** Cross-sectional FE-SEM images of free-standing CLCN-UCNPs films with different concentrations of CA-iso: (a) 2.8, (b) 3.5, and (c) 4.2 wt%.

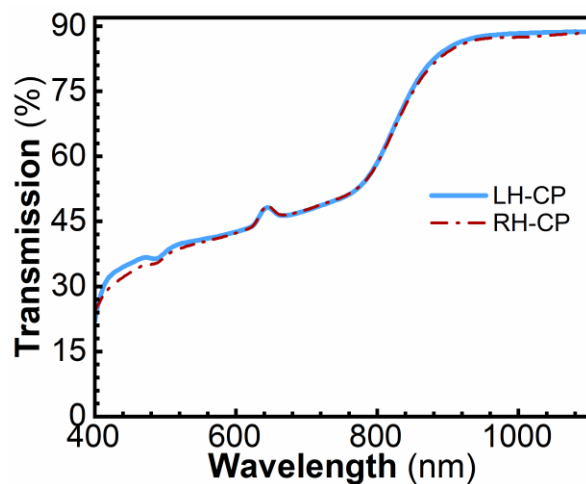

**Fig. S5** UV-vis spectra of left- and right-handed circular polarizers.

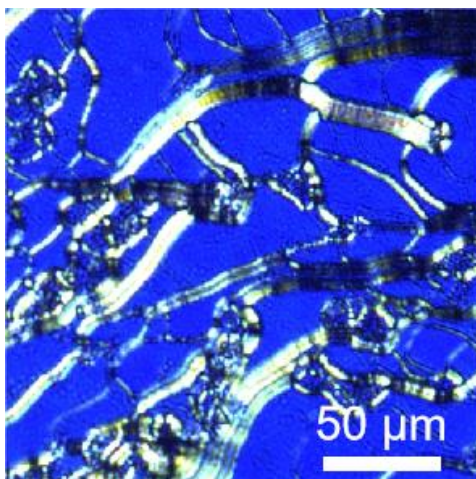

**Fig. S6** POM image of the LC242/CA-*iso*/UCNPs/Irgacure 907 (w/w/w/w, 90.3/3.7/3.0/3.0) mixture at 85 °C.

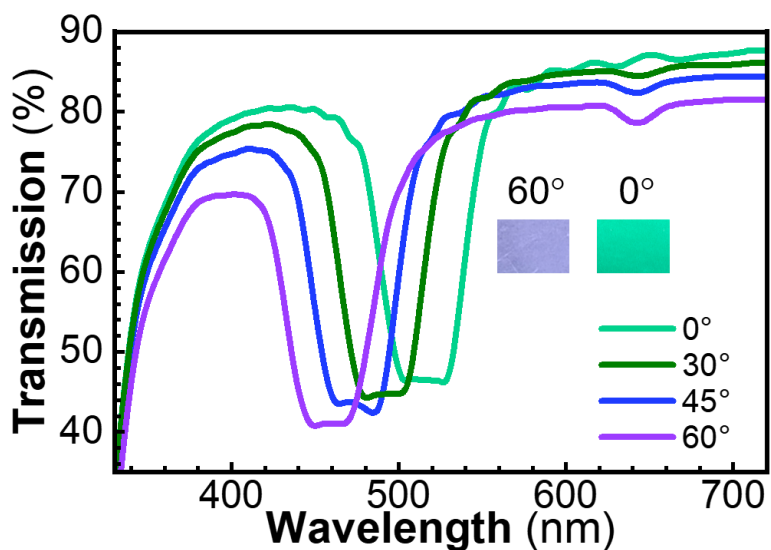

**Fig. S7** Angle-dependent UV-*vis* spectra of the CLCN-UCNPs-coated PET film. Inset: photographs of the film with viewing angles of 0° and 60°.

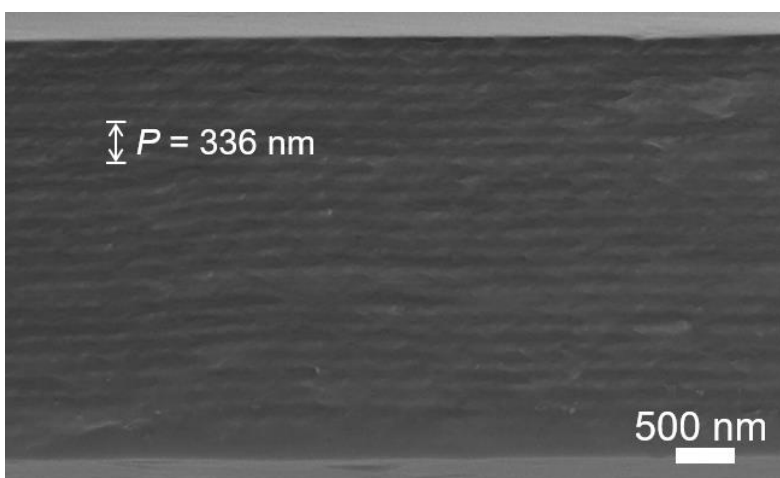

**Fig. S8** Cross-sectional FE-SEM image of the CLCN-UCNPs-coated PET film.



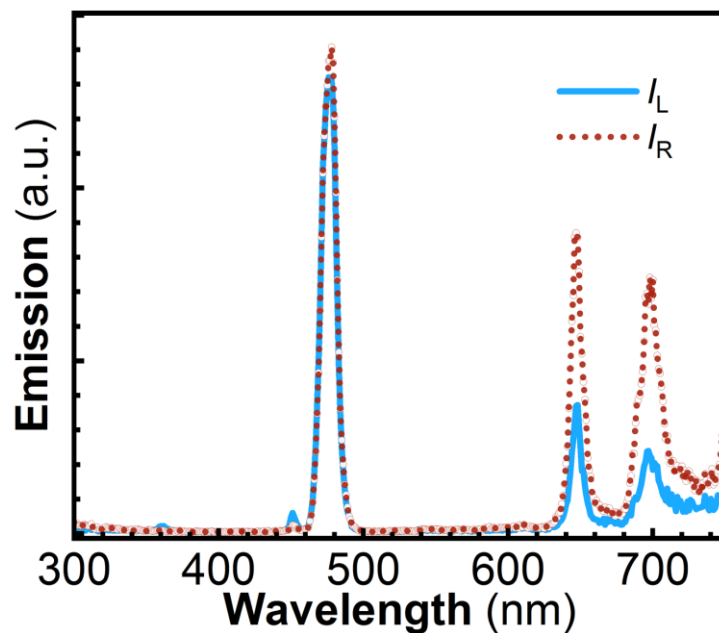

**Fig. S9** Emission spectra of the PMMA-UCNPs film through RH- and LH-CP excited by a 980 nm laser.

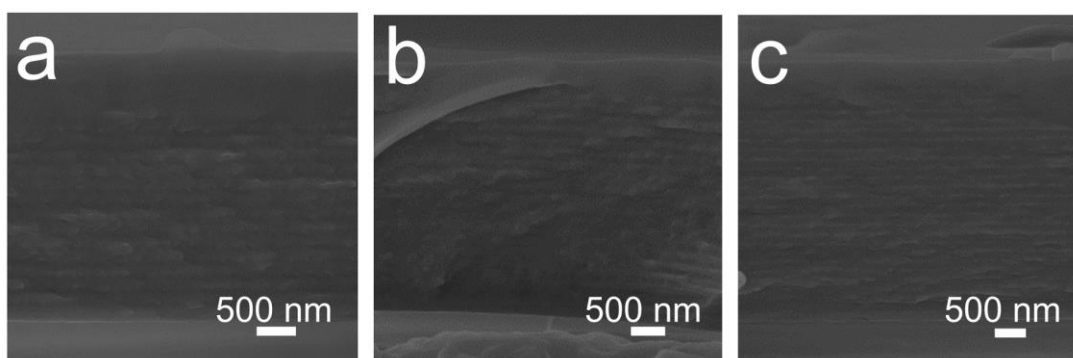

**Fig. S10** Cross-sectional FE-SEM image of the CLCN-coated PET film with different concentration of CA-iso: (a) 3.6 wt%, (b) 4.0 wt%, and (c) 4.2 wt%.

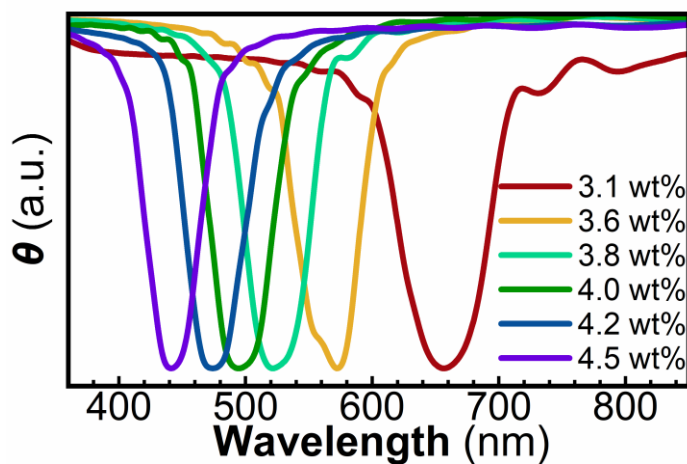

**Fig. S11** CD spectra of CLCN-coated PET films with different concentrations of CA-iso.

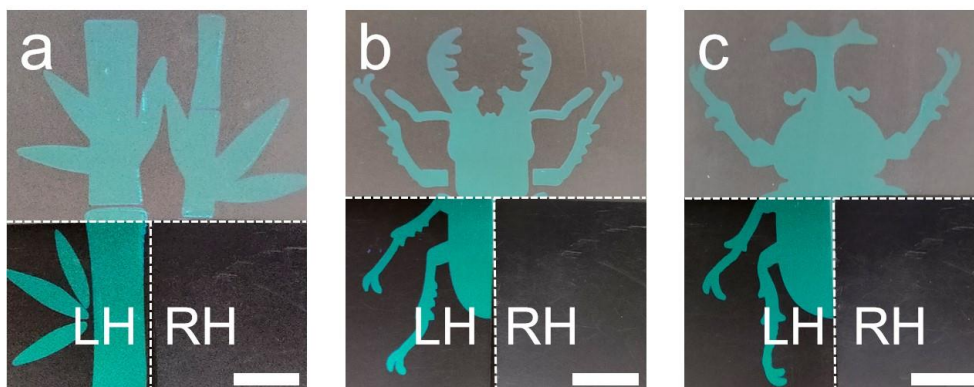

**Fig. S12** Images of CLCN-UCNPs-coated PET films with (a) a bamboo pattern, (b) and (c) beetle patterns viewed directly (top), through LH- and RH-CP, respectively (bottom). Scale bar: 1.0 cm.

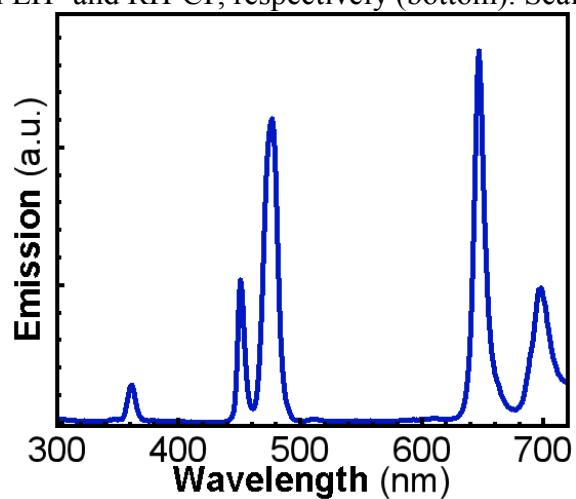

**Fig. S13** Emission spectrum of the CLCN-UCNPs-coated PET film with the bamboo pattern excited by a 980-nm laser.

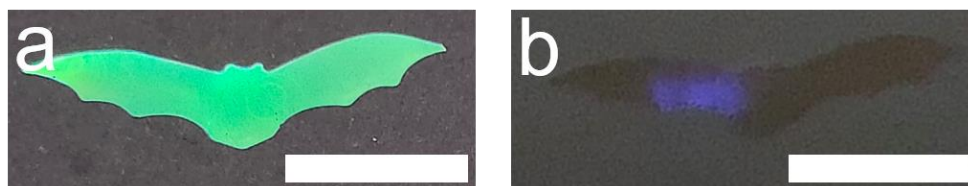

**Fig. S14** Images of the free-standing CLCN-UCNPs film with a bat pattern exposed to (a) daylight and (b) a 980-nm laser using a beam expander. Scale bar: 1.0 cm.
